# Supplementary material for: Significant methane undersaturation during austral summer in the Ross Sea (Southern Ocean)
Source: Copernicus journal article supplement (doi:10.5194/bg-2021-334), 2022-01-03
Supplement: Supplementary file 1 [file bg-2021-334-supplement.zip]

### CH<sub>4</sub> concentrations in the Ross Sea during the 36<sup>th</sup> CHINARE

| Station | Sample Identifier | Year<br>(UTC) | Month<br>(UTC) | Latitude<br>(Decimal<br>Degrees North) | Longitude<br>(Decimal Degrees<br>East) | Sample depth<br>(metres) | Bottom<br>Depth<br>(metres) | Water<br>Temperature,<br><i>in situ</i> (°C) | Salinity | CH <sub>4</sub> (nmol/L) |
|---------|-------------------|---------------|----------------|----------------------------------------|----------------------------------------|--------------------------|-----------------------------|----------------------------------------------|----------|--------------------------|
| R1      | R01-1-1           | 2020          | 1              | -75.0                                  | 164.0                                  | 6                        | 533                         | 0.1                                          | 34.46    | 3.2                      |
| R1      | R01-1-2           | 2020          | 1              | -75.0                                  | 164.0                                  | 25                       | 533                         | -1.8                                         | 34.69    | 2.7                      |
| R1      | R01-1-3           | 2020          | 1              | -75.0                                  | 164.0                                  | 50                       | 533                         | -1.9                                         | 34.71    | 2.8                      |
| R1      | R01-1-4           | 2020          | 1              | -75.0                                  | 164.0                                  | 75                       | 533                         | -1.9                                         | 34.72    | 4.0                      |
| R1      | R01-1-5           | 2020          | 1              | -75.0                                  | 164.0                                  | 101                      | 533                         | -1.9                                         | 34.73    | 3.6                      |
| R1      | R01-1-6           | 2020          | 1              | -75.0                                  | 164.0                                  | 148                      | 533                         | -1.9                                         | 34.74    | 3.3                      |
| R1      | R01-1-7           | 2020          | 1              | -75.0                                  | 164.0                                  | 196                      | 533                         | -2.0                                         | 34.74    | 3.1                      |
| R1      | R01-1-8           | 2020          | 1              | -75.0                                  | 164.0                                  | 294                      | 533                         | -2.0                                         | 34.76    | 2.9                      |
| R1      | R01-1-9           | 2020          | 1              | -75.0                                  | 164.0                                  | 511                      | 533                         | -1.9                                         | 34.78    | 3.1                      |
| R2      | R01-2-1           | 2020          | 1              | -75.0                                  | 165.0                                  | 5                        | 880                         | 0.2                                          | 34.17    | 3.4                      |
| R2      | R01-2-2           | 2020          | 1              | -75.0                                  | 165.0                                  | 26                       | 880                         | -1.2                                         | 34.39    | 5.2                      |
| R2      | R01-2-3           | 2020          | 1              | -75.0                                  | 165.0                                  | 51                       | 880                         | -1.8                                         | 34.69    | 3.0                      |
| R2      | R01-2-4           | 2020          | 1              | -75.0                                  | 165.0                                  | 77                       | 880                         | -1.9                                         | 34.72    | 3.6                      |
| R2      | R01-2-5           | 2020          | 1              | -75.0                                  | 165.0                                  | 100                      | 880                         | -1.9                                         | 34.74    | 3.4                      |
| R2      | R01-2-6           | 2020          | 1              | -75.0                                  | 165.0                                  | 150                      | 880                         | -1.9                                         | 34.75    | 3.1                      |
| R2      | R01-2-7           | 2020          | 1              | -75.0                                  | 165.0                                  | 199                      | 880                         | -1.9                                         | 34.76    | 3.3                      |
| R2      | R01-2-8           | 2020          | 1              | -75.0                                  | 165.0                                  | 300                      | 880                         | -1.9                                         | 34.77    | 2.6                      |
| R2      | R01-2-9           | 2020          | 1              | -75.0                                  | 165.0                                  | 502                      | 880                         | -1.9                                         | 34.82    | 3.3                      |
| R2      | R01-2-10          | 2020          | 1              | -75.0                                  | 165.0                                  | 870                      | 880                         | -1.9                                         | 34.84    | 2.8                      |
| R3      | R01-3-1           | 2020          | 1              | -75.0                                  | 166.0                                  | 5                        | 1022                        | 0.2                                          | 34.32    | 3.5                      |
| R3      | R01-3-2           | 2020          | 1              | -75.0                                  | 166.0                                  | 25                       | 1022                        | -0.6                                         | 34.49    | 4.2                      |
| R3      | R01-3-3           | 2020          | 1              | -75.0                                  | 166.0                                  | 51                       | 1022                        | -1.8                                         | 34.71    | 3.8                      |
| R3      | R01-3-4           | 2020          | 1              | -75.0                                  | 166.0                                  | 73                       | 1022                        | -1.8                                         | 34.72    | 3.9                      |
| R3      | R01-3-5           | 2020          | 1              | -75.0                                  | 166.0                                  | 102                      | 1022                        | -1.9                                         | 34.73    | 4.2                      |

|    |          |      |   |       |       |      |      |      |       |     |
|----|----------|------|---|-------|-------|------|------|------|-------|-----|
| R3 | R01-3-6  | 2020 | 1 | -75.0 | 166.0 | 150  | 1022 | -1.9 | 34.73 | 3.5 |
| R3 | R01-3-7  | 2020 | 1 | -75.0 | 166.0 | 201  | 1022 | -2.0 | 34.74 | 4.4 |
| R3 | R01-3-8  | 2020 | 1 | -75.0 | 166.0 | 303  | 1022 | -1.9 | 34.77 | 4.0 |
| R3 | R01-3-9  | 2020 | 1 | -75.0 | 166.0 | 505  | 1022 | -1.9 | 34.81 | 4.0 |
| R3 | R01-3-10 | 2020 | 1 | -75.0 | 166.0 | 1018 | 1022 | -1.9 | 34.84 | 3.0 |
| R4 | R01-4-1  | 2020 | 1 | -75.0 | 168.0 | 4    | 373  | -0.2 | 33.95 | 3.5 |
| R4 | R01-4-2  | 2020 | 1 | -75.0 | 168.0 | 24   | 373  | -0.6 | 34.26 | 4.0 |
| R4 | R01-4-3  | 2020 | 1 | -75.0 | 168.0 | 48   | 373  | -1.5 | 34.40 | 4.1 |
| R4 | R01-4-4  | 2020 | 1 | -75.0 | 168.0 | 71   | 373  | -1.5 | 34.55 | 3.8 |
| R4 | R01-4-5  | 2020 | 1 | -75.0 | 168.0 | 98   | 373  | -1.4 | 34.62 | 3.0 |
| R4 | R01-4-6  | 2020 | 1 | -75.0 | 168.0 | 148  | 373  | -1.9 | 34.69 | 2.9 |
| R4 | R01-4-7  | 2020 | 1 | -75.0 | 168.0 | 196  | 373  | -1.9 | 34.72 | 3.7 |
| R4 | R01-4-8  | 2020 | 1 | -75.0 | 168.0 | 298  | 373  | -1.9 | 34.74 | 4.0 |
| R4 | R01-4-9  | 2020 | 1 | -75.0 | 168.0 | 371  | 373  | -1.9 | 34.76 | 1.5 |
| R5 | R01-5-1  | 2020 | 1 | -75.0 | 170.4 | 4    | 331  | 1.4  | 34.23 | 2.7 |
| R5 | R01-5-2  | 2020 | 1 | -75.0 | 170.4 | 27   | 331  | -1.1 | 34.33 | 3.8 |
| R5 | R01-5-3  | 2020 | 1 | -75.0 | 170.4 | 51   | 331  | -1.9 | 34.68 | 2.4 |
| R5 | R01-5-4  | 2020 | 1 | -75.0 | 170.4 | 75   | 331  | -1.9 | 34.71 | 2.8 |
| R5 | R01-5-5  | 2020 | 1 | -75.0 | 170.4 | 101  | 331  | -1.9 | 34.71 | 2.1 |
| R5 | R01-5-6  | 2020 | 1 | -75.0 | 170.4 | 150  | 331  | -1.9 | 34.72 | 2.2 |
| R5 | R01-5-7  | 2020 | 1 | -75.0 | 170.4 | 202  | 331  | -1.9 | 34.73 | 2.8 |
| R5 | R01-5-8  | 2020 | 1 | -75.0 | 170.4 | 299  | 331  | -1.9 | 34.75 | 2.6 |
| R5 | R01-5-9  | 2020 | 1 | -75.0 | 170.4 | 312  | 331  | -1.9 | 34.76 | 2.4 |
| R6 | R01-6-1  | 2020 | 1 | -75.0 | 172.9 | 2    | 501  | 1.2  | 34.11 | 3.2 |
| R6 | R01-6-2  | 2020 | 1 | -75.0 | 172.9 | 24   | 501  | -0.6 | 34.19 | 2.6 |
| R6 | R01-6-3  | 2020 | 1 | -75.0 | 172.9 | 49   | 501  | -1.1 | 34.29 | 2.9 |
| R6 | R01-6-4  | 2020 | 1 | -75.0 | 172.9 | 72   | 501  | -1.4 | 34.43 | 3.3 |
| R6 | R01-6-5  | 2020 | 1 | -75.0 | 172.9 | 99   | 501  | -1.6 | 34.51 | 2.2 |
| R6 | R01-6-6  | 2020 | 1 | -75.0 | 172.9 | 148  | 501  | -1.5 | 34.56 | 2.3 |

|    |         |      |   |       |        |     |     |      |       |     |
|----|---------|------|---|-------|--------|-----|-----|------|-------|-----|
| R6 | R01-6-7 | 2020 | 1 | -75.0 | 172.9  | 199 | 501 | -1.7 | 34.60 | 2.2 |
| R6 | R01-6-8 | 2020 | 1 | -75.0 | 172.9  | 299 | 501 | -1.9 | 34.70 | 2.4 |
| R6 | R01-6-9 | 2020 | 1 | -75.0 | 172.9  | 490 | 501 | -1.9 | 34.77 | 2.7 |
| R7 | R01-7-1 | 2020 | 1 | -75.0 | 175.3  | 4   | 285 | 0.8  | 34.08 | 3.2 |
| R7 | R01-7-2 | 2020 | 1 | -75.0 | 175.3  | 23  | 285 | -0.9 | 34.11 | N.A |
| R7 | R01-7-3 | 2020 | 1 | -75.0 | 175.3  | 48  | 285 | -1.5 | 34.21 | 2.5 |
| R7 | R01-7-4 | 2020 | 1 | -75.0 | 175.3  | 73  | 285 | -1.5 | 34.37 | N.A |
| R7 | R01-7-5 | 2020 | 1 | -75.0 | 175.3  | 100 | 285 | -1.1 | 34.44 | N.A |
| R7 | R01-7-6 | 2020 | 1 | -75.0 | 175.3  | 148 | 285 | -0.8 | 34.53 | N.A |
| R7 | R01-7-7 | 2020 | 1 | -75.0 | 175.3  | 201 | 285 | -1.0 | 34.57 | 5.5 |
| R7 | R01-7-8 | 2020 | 1 | -75.0 | 175.3  | 276 | 285 | -1.6 | 34.63 | N.A |
| R8 | R01-8-1 | 2020 | 1 | -75.0 | 177.7  | 4   | 393 | 0.6  | 34.20 | N.A |
| R8 | R01-8-2 | 2020 | 1 | -75.0 | 177.7  | 27  | 393 | -0.3 | 34.24 | N.A |
| R8 | R01-8-3 | 2020 | 1 | -75.0 | 177.7  | 50  | 393 | -1.0 | 34.31 | N.A |
| R8 | R01-8-4 | 2020 | 1 | -75.0 | 177.7  | 74  | 393 | -1.4 | 34.41 | N.A |
| R8 | R01-8-5 | 2020 | 1 | -75.0 | 177.7  | 100 | 393 | -1.3 | 34.46 | N.A |
| R8 | R01-8-6 | 2020 | 1 | -75.0 | 177.7  | 150 | 393 | -1.6 | 34.50 | N.A |
| R8 | R01-8-7 | 2020 | 1 | -75.0 | 177.7  | 200 | 393 | -1.7 | 34.51 | N.A |
| R8 | R01-8-8 | 2020 | 1 | -75.0 | 177.7  | 300 | 393 | -1.7 | 34.56 | N.A |
| R8 | R01-8-9 | 2020 | 1 | -75.0 | 177.7  | 381 | 393 | -1.8 | 34.64 | N.A |
| R9 | R01-9-1 | 2020 | 1 | -75.0 | -179.9 | 5   | 461 | -0.4 | 33.68 | 2.8 |
| R9 | R01-9-2 | 2020 | 1 | -75.0 | -179.9 | 26  | 461 | -0.9 | 34.10 | 3.1 |
| R9 | R01-9-3 | 2020 | 1 | -75.0 | -179.9 | 51  | 461 | -1.4 | 34.25 | N.A |
| R9 | R01-9-4 | 2020 | 1 | -75.0 | -179.9 | 75  | 461 | -1.3 | 34.36 | 2.5 |
| R9 | R01-9-5 | 2020 | 1 | -75.0 | -179.9 | 100 | 461 | -1.1 | 34.41 | N.A |
| R9 | R01-9-6 | 2020 | 1 | -75.0 | -179.9 | 149 | 461 | -1.3 | 34.45 | N.A |
| R9 | R01-9-7 | 2020 | 1 | -75.0 | -179.9 | 200 | 461 | -1.4 | 34.49 | N.A |
| R9 | R01-9-8 | 2020 | 1 | -75.0 | -179.9 | 300 | 461 | -1.6 | 34.52 | N.A |
| R9 | R01-9-9 | 2020 | 1 | -75.0 | -179.9 | 452 | 461 | -1.9 | 34.66 | N.A |

|     |                 |             |          |       |        |     |     |      |       |     |
|-----|-----------------|-------------|----------|-------|--------|-----|-----|------|-------|-----|
| R10 | <b>R01-10-1</b> | <b>2020</b> | <b>1</b> | -75.0 | -177.8 | 4   | 470 | -1.0 | 34.01 | 2.3 |
| R10 | <b>R01-10-2</b> | <b>2020</b> | <b>1</b> | -75.0 | -177.8 | 25  | 470 | -1.2 | 34.13 | 2.4 |
| R10 | <b>R01-10-3</b> | <b>2020</b> | <b>1</b> | -75.0 | -177.8 | 50  | 470 | -1.4 | 34.22 | 2.1 |
| R10 | <b>R01-10-4</b> | <b>2020</b> | <b>1</b> | -75.0 | -177.8 | 76  | 470 | -1.5 | 34.22 | 2.4 |
| R10 | <b>R01-10-5</b> | <b>2020</b> | <b>1</b> | -75.0 | -177.8 | 100 | 470 | -1.4 | 34.28 | 2.1 |
| R10 | <b>R01-10-6</b> | <b>2020</b> | <b>1</b> | -75.0 | -177.8 | 150 | 470 | -1.3 | 34.33 | 2.5 |
| R10 | <b>R01-10-7</b> | <b>2020</b> | <b>1</b> | -75.0 | -177.8 | 201 | 470 | -1.2 | 34.40 | 2.0 |
| R10 | <b>R01-10-8</b> | <b>2020</b> | <b>1</b> | -75.0 | -177.8 | 303 | 470 | -1.2 | 34.48 | 2.7 |
| R10 | <b>R01-10-9</b> | <b>2020</b> | <b>1</b> | -75.0 | -177.8 | 464 | 470 | -1.7 | 34.61 | 2.9 |

N.A.: Not available
