# Supplementary material for: Significant methane undersaturation during austral summer in the Ross Sea (Southern Ocean)
Source: Copernicus journal article supplement (doi:10.5194/bg-2021-334), 2022-01-03
Supplement: Supplementary file 2 [file bg-2021-334-supplement.zip]

## Supporting Information for

### **Significant methane undersaturation during austral summer in the Ross Sea (Southern Ocean)**

Wangwang Ye<sup>1</sup>, Hermann W. Bange<sup>2</sup>, Damian L. Arévalo-Martínez<sup>2</sup>, Hailun He<sup>3</sup>, Yuhong Li<sup>1</sup>, Jianwen Wen<sup>1</sup>, Jiexia Zhang<sup>1</sup>, Jian Liu<sup>1</sup>, Man Wu<sup>1</sup>, Liyang Zhan<sup>1,\*</sup>

1 Key Laboratory of Global Change and Marine-Atmospheric Chemistry, Third Institute of Oceanography, Ministry of Natural Resources, 361005 Xiamen, China.

2 GEOMAR Helmholtz Centre for Ocean Research Kiel, Düsternbrooker Weg 20, 24105 Kiel, Germany

3 State Key Laboratory of Satellite Ocean Environment Dynamics, Second Institute of Oceanography, Ministry of Natural Resources, 310012 Hangzhou, China

\*Corresponding author: Liyang Zhan (zhanliyang@tio.org.cn)

#### **Contents of this file**

Text S1  
Figures S1 to S3  
Tables S1 to S5

#### **Introduction**

This supplement includes an expanded explanation of CH<sub>4</sub> analysis, the correlations between water masses and CH<sub>4</sub> saturation, a conceptual diagram of dissolved CH<sub>4</sub> in the Ross Sea, the T-S definition of water mass classification, and information on the vertical distribution of main water masses.

**Text S1.** Description of CH<sub>4</sub> analysis

Water samples from the BOD bottles were dispensed into 20 ml glass vials (triplicate for each bottle) prior to analysis. CH<sub>4</sub> concentrations were determined by an Agilent 7890A gas chromatograph that was fitted with a flame ionization detector (FID) using a gas purge-and-trap method. Briefly, seawater was introduced into a stripping chamber and purged with ultrahigh-purity (UHP) helium (70 ml/min). During sparging, the gas stream passed through a Nafion tube to remove water vapor before flowing into a stainless-steel trap. The trap was filled with 5A molecular sieve and cooled in liquid nitrogen to concentrate CH<sub>4</sub>. After extraction (5 min), the trap was attached to an electronic copper wire and heated to release gas into the gas chromatograph using high-purity nitrogen as the carrier gas (30 ml/min). Subsequently, CH<sub>4</sub> was separated on three stainless steel columns (3 m × 3 mm) packed with Hayesep-Q (80/100 mesh) and quantified with the FID at 250 °C. The peak areas for CH<sub>4</sub> quantification were calibrated by using known-volume injections of CH<sub>4</sub> standards (CH<sub>4</sub>:N<sub>2</sub> mixtures of 1.0, 3.0, 5.2, 7.1, 12.0, and 29.9 ppm, National Institute of Metrology, China) (**Figure S1**). The 3.0 ppm standard was used to monitor the signal drifting every three hours because it is the best match concentration with that in seawater. All standards were introduced into the stripping chamber and analyzed following the same procedure as that for the water samples.

The blank refers to the pre-purged seawater that was without CH<sub>4</sub> but was analyzed following the same procedure. We used two standard deviations of 10 times blank of purge-trap concentrations (20 ml) as the definition of the limit of detection (**Table S4**), which yields 0.04 nmol/L. Our results are comparable to the similar method reported by Zhang et al. (2004), whose limit of detection was 0.06 nmol/L. We also used the control sample to test the reproducibility (**Table S5**). The control sample is the equilibrium seawater (sparging with air for 48 h) with the addition of saturated HgCl<sub>2</sub>.

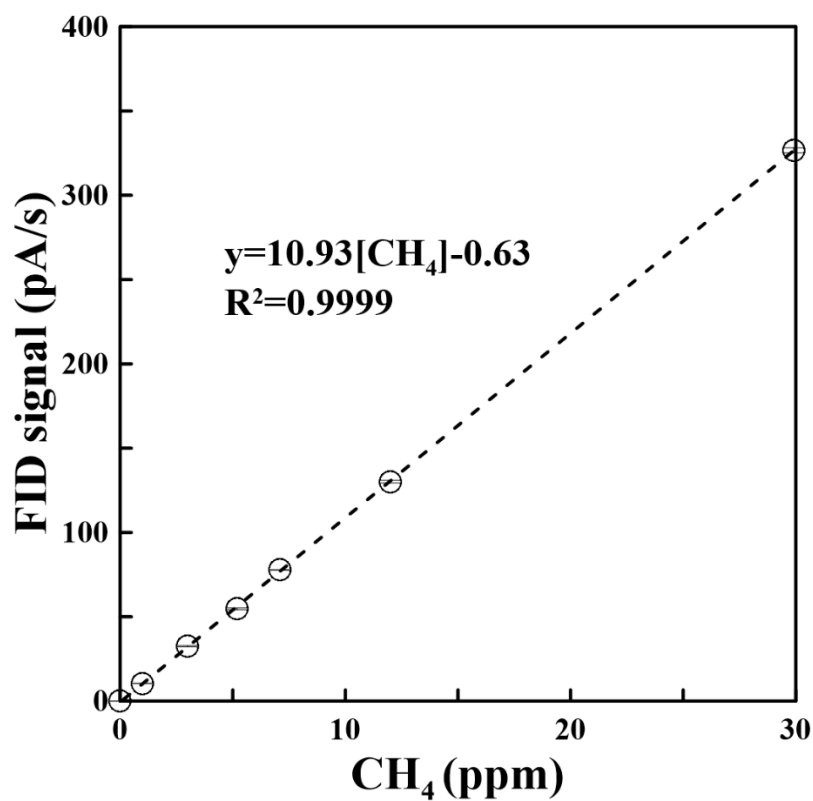

**Figure S1.** Correlations between FID signal and CH<sub>4</sub> standard. Error bars represent 1 standard deviation of triplicates. When error bars are not visible, they are within the area of the symbol.

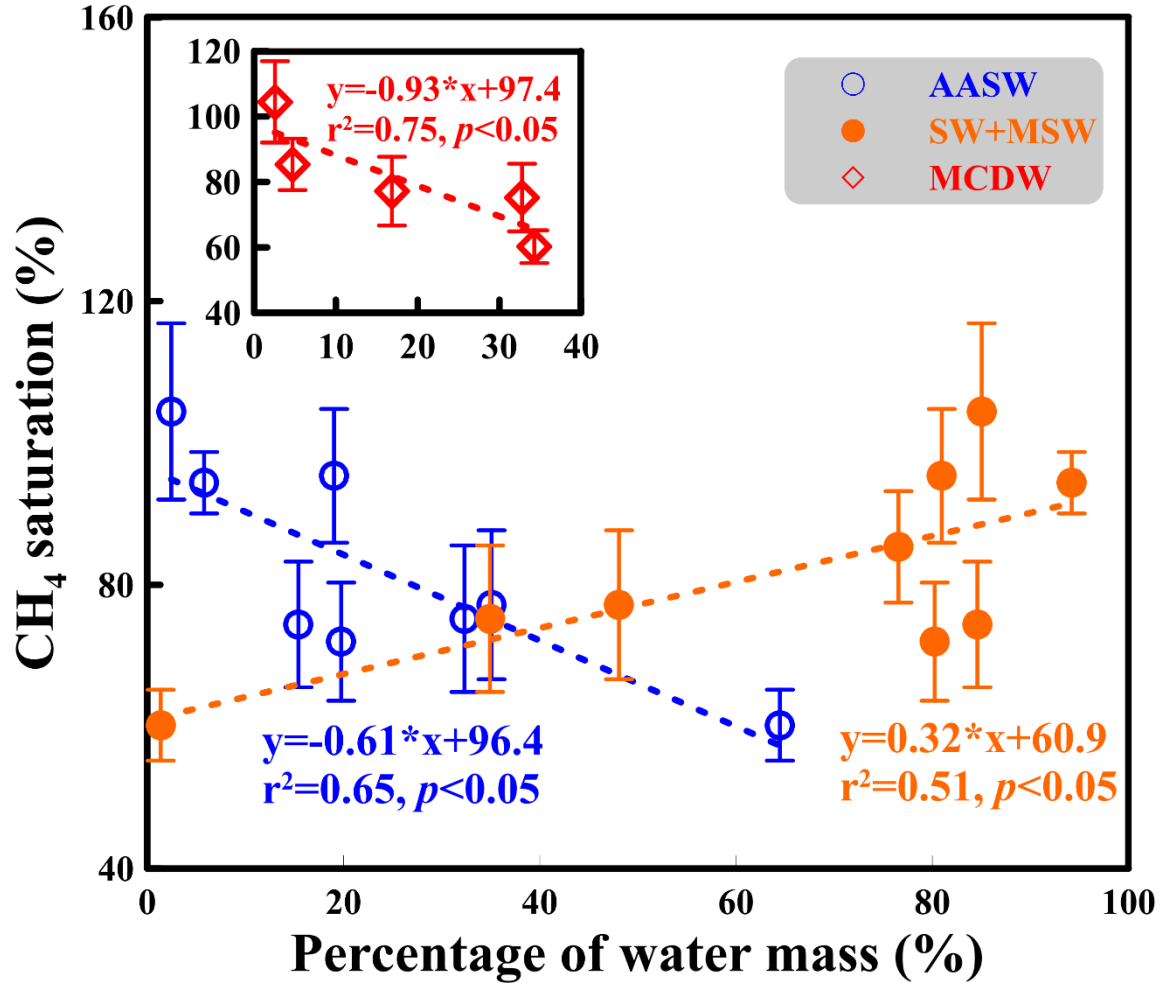

**Figure S2.** Correlations between water masses and CH<sub>4</sub> saturation (if available) at all stations (0–200 m) excluding the near-bottom samples at station R7 (see text). The SW and MSW were combined because the MSW was originated from the SW and they had close hydrographic features (Figure 2a) and similar CH<sub>4</sub> signals. The analytical errors are depicted by the error bars (only show the negative direction to reduce overlaying).

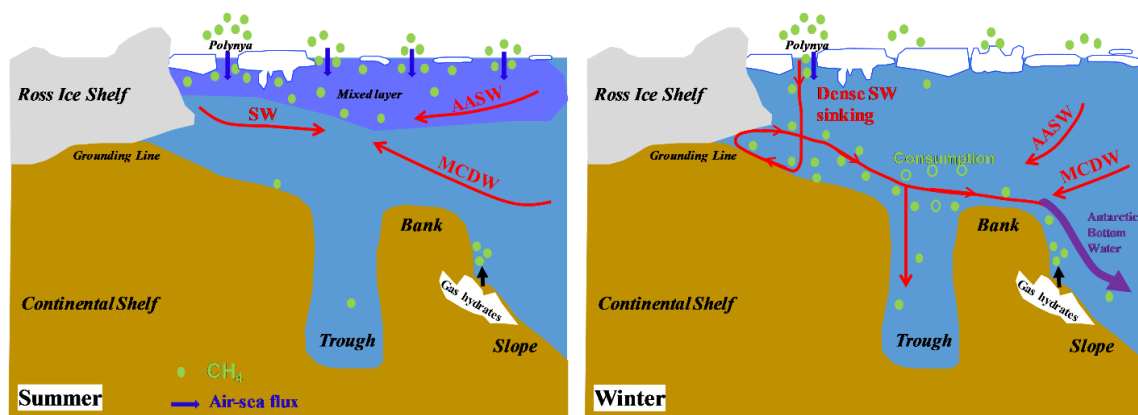

**Figure S3.** Conceptual diagram showing the water transport and air-sea exchange affecting  $\text{CH}_4$  removal in the Ross Sea. Sea ice melting and  $\text{CH}_4$ -poor AASW intrusion in summer increase  $\text{CH}_4$  diffusion into the ocean surface; dense SW sinking (as a “water pump” for delivering  $\text{CH}_4$ ) in winter transports mixed-layer  $\text{CH}_4$  into the deep ocean;  $\text{CH}_4$  that originated from the atmosphere is sealed in troughs, consumed in the water, and joins the circulation of Antarctic Bottom Water, making the Ross Sea a potential sink for atmospheric  $\text{CH}_4$ .

**Table S1.** Water mass definitions and their characteristics ( $\theta$ , salinity, and  $\text{CH}_4$  saturation) calculated in this study.

| Water mass* | Definition                                                   | Reference                  | $\theta$<br>(mean $\pm$ SD) | Salinity<br>(mean $\pm$ SD) | Saturation<br>(mean $\pm$ SD) | Variability in<br>$\text{CH}_4$ saturation <sup>#</sup> |
|-------------|--------------------------------------------------------------|----------------------------|-----------------------------|-----------------------------|-------------------------------|---------------------------------------------------------|
| AASW        | $\theta > -1.8$ , $S < 34.45$                                | Orsi and Wiederwohl (2009) | $0.7 \pm 0.8$               | $34.23 \pm 0.16$            | $79 \pm 18$                   | 5                                                       |
| SW          | $-1.9 < \theta < -1.8$ , $S > 34.50$ ,<br>$\gamma^n > 28.27$ | Williams et al. (2016)     | $-1.9 \pm 0.0$              | $34.74 \pm 0.04$            | $82 \pm 16$                   | 9                                                       |
| MSW         | $\theta > -1.8$ , $S > 34.50$                                | Orsi and Wiederwohl (2009) | $-1.6 \pm 0.3$              | $34.60 \pm 0.07$            | $85 \pm 27$                   | N.A                                                     |
| ISW         | $\theta < -1.9$                                              | Schodlok et al. (2016)     | $-2.0 \pm 0.0$              | $34.75 \pm 0.01$            | $90 \pm 22$                   | N.A                                                     |
| MCDW        | $\theta > -1.8$ , $28.00 < \gamma^n < 28.27$                 | Orsi and Wiederwohl (2009) | $-1.0 \pm 0.6$              | $34.47 \pm 0.02$            | $91 \pm 21$                   | N.A                                                     |

\*AASW: Antarctic Surface Water, SW: Shelf Water, MSW: Modified Shelf Water (MSW), ISW: Ice Shelf Water, MCDW: Modified Circumpolar Deep Water;

<sup>#</sup>Standard deviation calculated from the station only dominated by a specific water mass (>60% contribution). N.A means no station was dominated by this water mass.

**Table S2.** Summary of vertical distribution of water masses at stations R1-R10 in the Ross Sea during sampling period.

| Station | Bottom Depth (m) | Layers of which water mass occupied (m)* |                   |         |         |         |
|---------|------------------|------------------------------------------|-------------------|---------|---------|---------|
|         |                  | AASW                                     | SW                | MSW     | ISW     | MCDW    |
| R1      | 533              | NaN                                      | 50–196; 294–511   | 25–50   | 196–294 | 0–25    |
| R2      | 880              | 0-51                                     | 77-880            | 51–77   | NaN     | NaN     |
| R3      | 1022             | 0-25                                     | 102–201; 303–1022 | 51–102  | 201–303 | 25-51   |
| R4      | 373              | 0-71                                     | 148–373           | 71–148  | NaN     | NaN     |
| R5      | 331              | 0-51                                     | 51–331            | NaN     | NaN     | NaN     |
| R6      | 501              | 0-99                                     | 299–501           | 99–299  | NaN     | NaN     |
| R7      | 285              | 0-100                                    | NaN               | 148–285 | NaN     | 100–148 |
| R8      | 393              | 0-100                                    | NaN               | 200–393 | NaN     | 100–200 |
| R9      | 461              | 0-149                                    | 452–461           | 300–452 | NaN     | 149–300 |
| R10     | 470              | 0-303                                    | 469–470           | 464–469 | NaN     | 303–464 |

\*Calculated from temperature/salinity properties of each water mass (Table S1). NaN represents the absence of specific water at this station.

**Table S3.** Estimation in percentage of water mass at stations R1-R10 in the Ross Sea during sampling period.

| Station | Percentage of water mass (%) |      |      |      |      |
|---------|------------------------------|------|------|------|------|
|         | AASW                         | SW   | MSW  | ISW  | MCDW |
| R1      | 0.0                          | 71.9 | 4.7  | 18.8 | 4.7  |
| R2      | 5.8                          | 91.3 | 3.0  | 0.0  | 0.0  |
| R3      | 2.4                          | 80.0 | 5.0  | 10.0 | 2.5  |
| R4      | 19.0                         | 60.3 | 20.6 | 0.0  | 0.0  |
| R5      | 15.4                         | 84.6 | 0.0  | 0.0  | 0.0  |
| R6      | 19.8                         | 40.3 | 39.9 | 0.0  | 0.0  |
| R7      | 35.1                         | 0.0  | 48.1 | 0.0  | 16.8 |
| R8      | 25.4                         | 0.0  | 49.1 | 0.0  | 25.4 |
| R9      | 32.3                         | 2.0  | 33.0 | 0.0  | 32.8 |
| R10     | 64.5                         | 0.1  | 1.2  | 0.0  | 34.3 |

**Table S4.** Concentrations of blank in the purge-and-trap method.

| No.                | Concentration (nM) |
|--------------------|--------------------|
| 1                  | 0.49               |
| 2                  | 0.44               |
| 3                  | 0.44               |
| 4                  | 0.49               |
| 5                  | 0.51               |
| 6                  | 0.46               |
| 7                  | 0.46               |
| 8                  | 0.47               |
| 9                  | 0.46               |
| 10                 | 0.47               |
| Average            | 0.47               |
| Standard deviation | 0.02               |
| Limit of detection | 0.04               |

**Table S5.** Concentrations of control samples in the purge-and-trap method.

| No.                   | Concentration (nM) |
|-----------------------|--------------------|
| 1                     | 3.01               |
| 2                     | 2.98               |
| 3                     | 3.45               |
| 4                     | 3.11               |
| 5                     | 3.13               |
| 6                     | 3.01               |
| 7                     | 3.05               |
| 8                     | 2.98               |
| 9                     | 3.00               |
| 10                    | 2.91               |
| 11                    | 3.00               |
| Standard deviation    | 0.14               |
| Precision             | 5%                 |
| Average               | 3.06               |
| Theory concentration* | 2.71               |

\*Calculated in the room temperature (21 °C) based on Henry's law (Wiesenburg and Guinasso, 1979).
