# Supplementary material for: Significant methane undersaturation during austral summer in the Ross Sea (Southern Ocean)
Source: Copernicus journal article supplement (doi:10.5194/bg-2021-334), 2022-01-03
Supplement: Supplementary file 3 [file bg-2021-334-supplement.zip]

Archive with 2 entries (2 files):
- Supplement Table.pdf
- Supplement.pdf
